# Supplementary material
Source: Royal Society of Chemistry journal article supplement (doi:10.1039/d6tc01143h)
Supplement: d6tc01143h1.pdf [file d6tc01143h1.pdf]

## Supporting Information

### 16.55% Power Conversion Efficiency Achieved in PM6:Y6 Organic

#### Solar Cells Based on Salicylic Acid-Doped ZnO

Wenwen Chen<sup>a</sup>, Weidi Liu<sup>a</sup>, Na Li<sup>b\*</sup>, Qikun Rong<sup>a\*</sup>, Chen Wangqiao<sup>a\*</sup>

<sup>a</sup>) Guangdong Provincial Key Laboratory of Optical Information Materials and Technology & Institute of Electronic Paper Displays, South China Academy of Advanced Optoelectronics, South China Normal University, Guangzhou 510006, China. E-mail: [wqchen@m.scnu.edu.cn](mailto:wqchen@m.scnu.edu.cn) (W. Chen), [rongqikun@m.scnu.edu.cn](mailto:rongqikun@m.scnu.edu.cn) (Q. Rong),

<sup>b</sup>) School of Information and Optoelectronic Science and Engineering, South China Normal University, Guangzhou, 510006, China. E-mail: [dreamerlina@163.com](mailto:dreamerlina@163.com) (N. Li)

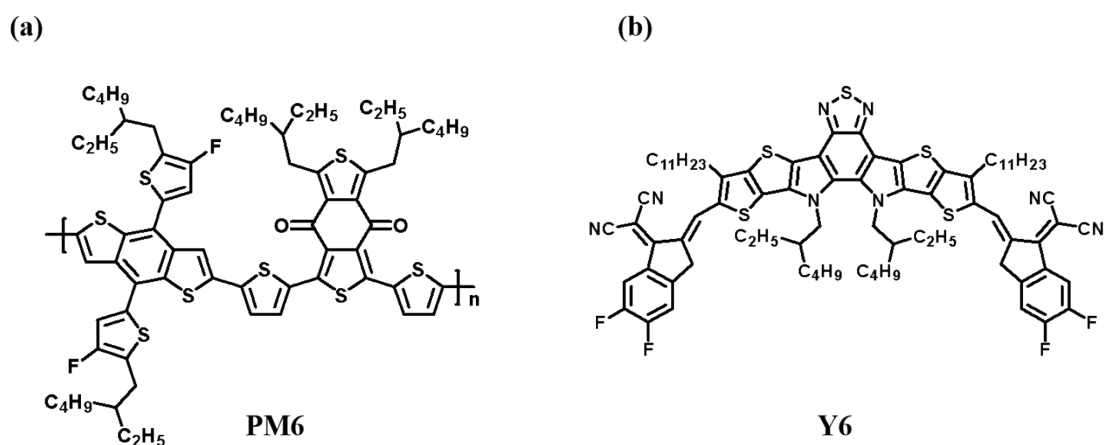

**Figure S1.** The molecular structures of PM6 and Y6

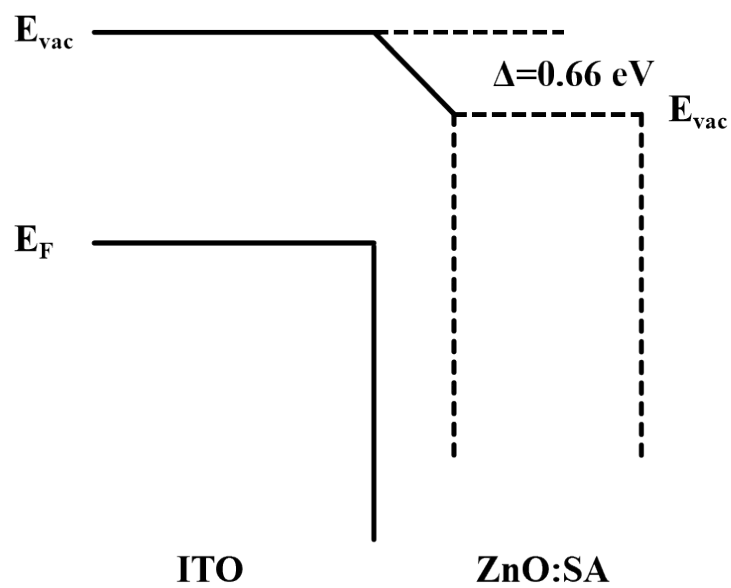

**Figure S2.** Schematic diagram of planar energy levels for ZnO:SA in inverted devices.

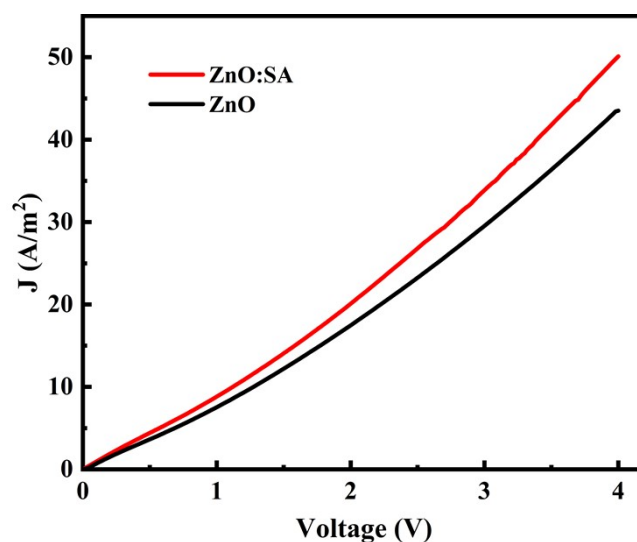

**Figure S3.** J-V characteristic curves of electron-only devices

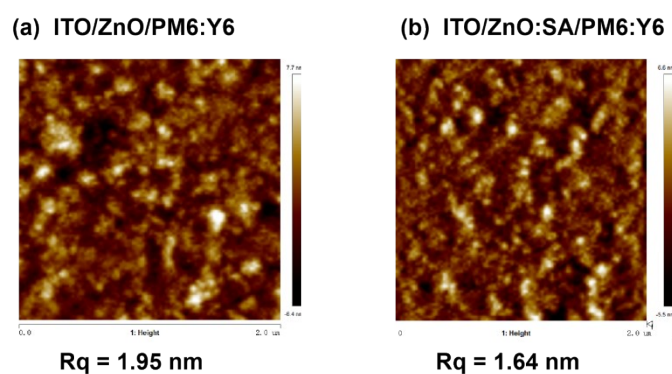

**Figure S4.** AFM images for PM6:Y6 active layer on ITO/ZnO and ITO/ZnO;SA substrates

**Table S1.** Summary of the measured contact angles and surface energies for ZnO and ZnO:SA urfaces.

| Surface | Water contact angle | Formamide contact angle | Surface energy [mN/m] |
|---------|---------------------|-------------------------|-----------------------|
| ZnO     | 33.6                | 42.1                    | 67.65                 |
| ZnO:SA  | 33.1                | 30.3                    | 55.84                 |
